# Supplementary material for: Structural evolution and solvation of the OH radical in ionized water radical cations (H2O)n+, n = 5–8
Source: Royal Society of Chemistry journal article supplement (doi:10.1039/c4cp02293a), 2014-01-01
Supplement: c4cp02293a1.pdf [file c4cp02293a1.pdf]

# Structural Evolution and Solvation of OH radical in Ionized Water Radical Cations $(\text{H}_2\text{O})_n^+$ , $n = 5 \sim 8$

## Supporting Information

En-Ping Lu,<sup>a</sup> Piin-Ruey Pan,<sup>a</sup> Ying-Cheng Li,<sup>a</sup>  
Ming-Kang Tsai, <sup>\*b</sup> and Jer-Lai Kuo<sup>\*a</sup>

- a. *Institute of Atomic and Molecular Sciences, Academia Sinica, Taipei 10617, Taiwan. E-mail: jlkuo@pub.iam.s.sinica.edu.tw*
- b. *Department of Chemistry, National Taiwan Normal University, Taipei 10677, Taiwan. E-mail: mktsai@ntnu.edu.tw*

| Contents                                                                                                                             | Page # |
|--------------------------------------------------------------------------------------------------------------------------------------|--------|
| 1. A more detailed version of Figure 1.                                                                                              | 3      |
| 2. Comparison on the relative stability of low-energy isomers by several Exc and MP2                                                 |        |
| 3. The coordinate of most stable structures of $(\text{H}_2\text{O})_{5-8}^+$ at BH&HLYP/aug-cc-pVDZ in different topological groups | 4      |
| 4. The parameters table for $(\text{H}_2\text{O})_{5-8}^+$                                                                           | 19     |

Relative energy of the stable isomers of  $(\text{H}_2\text{O})_n^+$  found by our searching method at BH&HLYP/aug-cc-pVDZ.

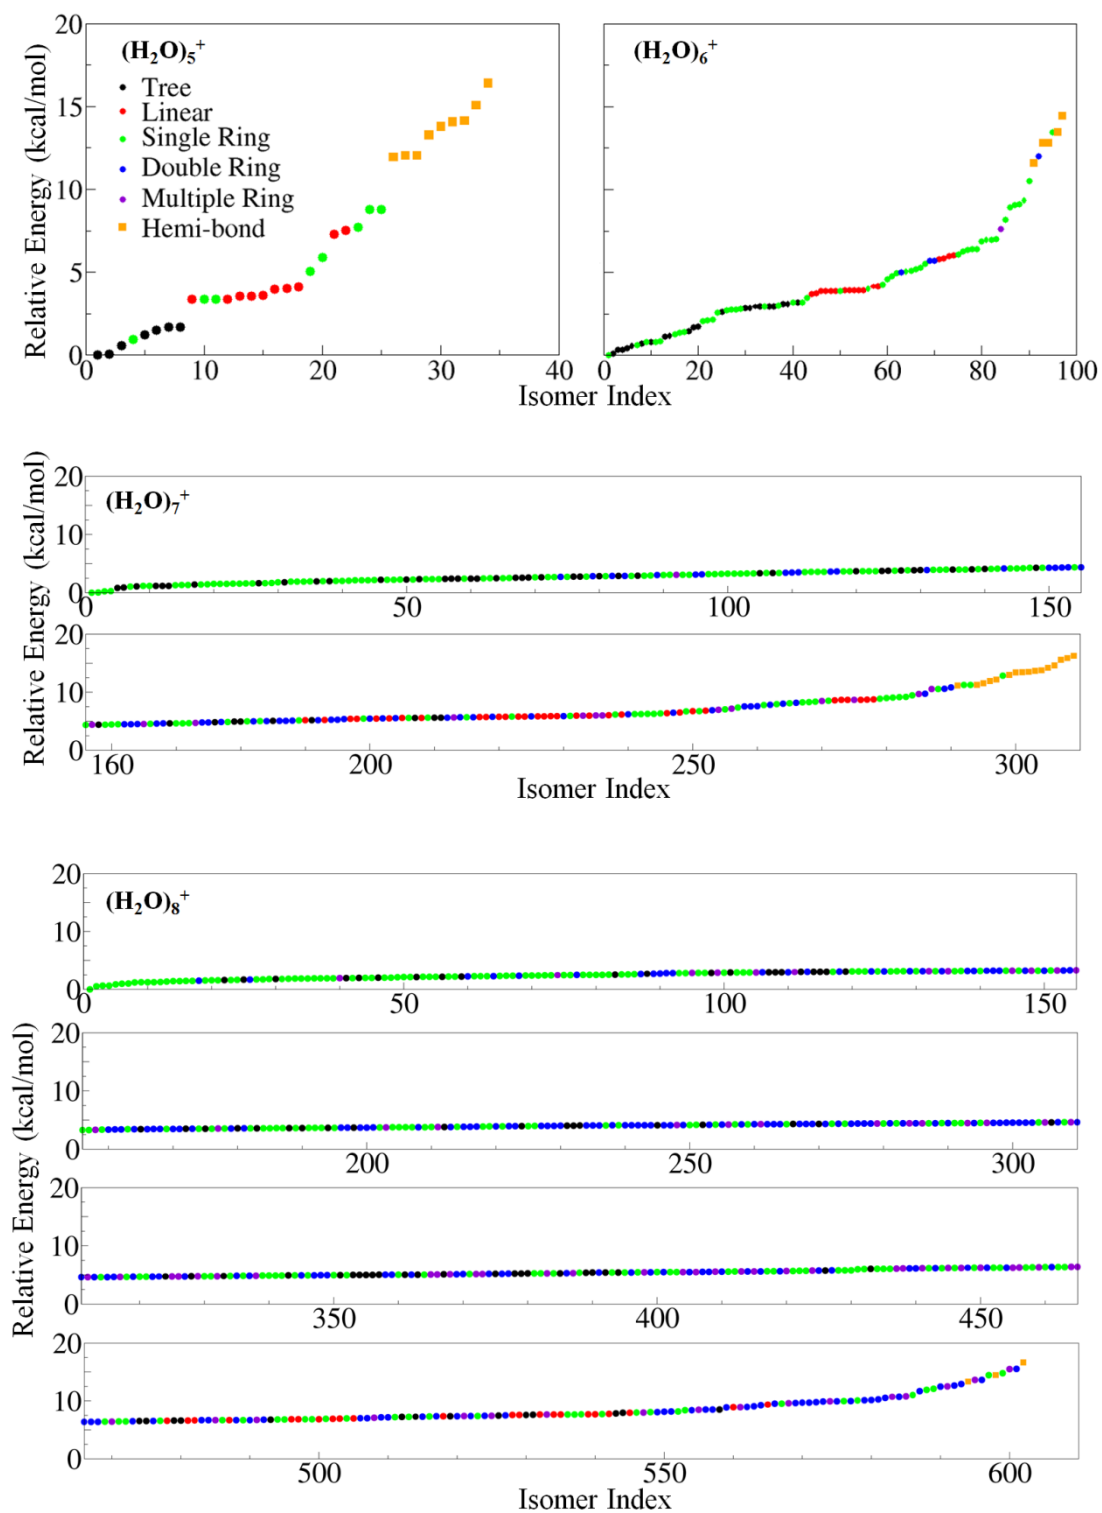

Comparison on the ZPE corrected relative energy of isomers in Figure 3 using BH&HLYP/aug-cc-pvDZ, B3LYP/6-311++G\*\*, B3LYP-D3/6-311++G\*\* and MP2/6-311++G\*\*) to address the role of dispersion on the relative stability. One can find from the following figure that BH&HLYP/aug-cc-pvDZ (1) yield the same ground state structures and (2) the order of the relative stability between multiple ring and single ring is the same for BH&HLYP/aug-cc-pvDZ, B3LYP-D3/6-311++G\*\* and MP2/6-311++G\*\*.

|                            | Tree   | Linear | Single ring | Double ring | Multiple ring | Hemi-bonded | Besley's minimum |
|----------------------------|--------|--------|-------------|-------------|---------------|-------------|------------------|
| $(\text{H}_2\text{O})_6^+$ |        |        |             |             |               |             |                  |
| BH&HLYP                    | 0.12   | 3.70   | 0.0         | 5.02        | 7.62          | 11.61       | 0.33             |
| B3LYP                      | 1.22   | 3.93   | 0.0         | 4.68        | 7.26          | 2.41        | 1.43             |
| B3LYP-D3                   | (1.27) | (4.27) | (0.0)       | (3.91)      | (5.53)        | (2.09)      | (1.48)           |
| MP2                        | 0.13   | 4.28   | 0.0         | 3.83        | 3.58          | 7.07        | 0.31             |
| $(\text{H}_2\text{O})_7^+$ |        |        |             |             |               |             |                  |
| BH&HLYP                    | 0.81   | 5.16   | 0.0         | 2.70        | 3.04          | 11.15       | 1.08             |
| B3LYP                      | 1.82   | 4.77   | 0.0         | 2.04        | 2.79          | 0.89        | 1.73             |
| B3LYP-D3                   | (2.02) | (5.01) | (0.0)       | (1.48)      | (0.98)        | (0.45)      | (2.23)           |
| MP2                        | 0.69   | 5.31   | 0.0         | 1.96        | 1.59          | 18.46       | 0.90             |
| $(\text{H}_2\text{O})_8^+$ |        |        |             |             |               |             |                  |
| BH&HLYP                    | 1.59   | 6.59   | 0.0         | 1.48        | 1.93          | 13.34       | 1.86             |
| B3LYP                      | 2.92   | 7.20   | 0.0         | 1.32        | 1.70          | 3.56        | 1.42             |
| B3LYP-D3                   | (3.76) | (7.80) | (0.0)       | (1.02)      | (0.05)        | (2.54)      | (1.04)           |
| MP2                        | 2.67   | 7.47   | 0.0         | 1.49        | 1.59          | 22.93       | 1.55             |

The coordinate of the most stable structures of  $(\text{H}_2\text{O})_n^+$  at BH&HLYP/aug-cc-pVDZ in different topological groups. The relative energies are corrected with zero-point energy.

## $(\text{H}_2\text{O})_5^+$

#1 (Tree): +0 kcal/mol

|   |           |           |           |
|---|-----------|-----------|-----------|
| O | -0.057328 | 1.193976  | 2.894928  |
| O | 2.461812  | -1.559880 | 0.677465  |
| O | -0.466720 | 0.838900  | -1.391776 |
| O | 0.310472  | -0.170393 | 0.757134  |
| O | -2.708089 | -0.377490 | -2.508975 |
| H | 0.020541  | 0.270108  | -0.107929 |
| H | -0.152747 | 1.619141  | -1.840064 |
| H | -3.258512 | -0.243096 | -3.293417 |
| H | 3.356982  | -1.293847 | 0.480242  |
| H | 0.414895  | 1.953155  | 3.229046  |
| H | 1.165938  | -0.674466 | 0.711687  |
| H | 0.200835  | 0.383475  | 1.575009  |
| H | 2.458238  | -2.511160 | 0.760262  |
| H | -1.240566 | 0.501360  | -1.861273 |
| H | -0.718486 | 0.960597  | 3.543137  |

#4 (Single ring): +0.95 kcal/mol

|   |           |           |           |
|---|-----------|-----------|-----------|
| O | -0.178028 | -0.206007 | -2.013116 |
| O | -2.445543 | -1.255147 | -0.465090 |
| O | 1.124926  | 0.207223  | 0.131668  |
| O | -0.640452 | -0.615542 | 1.767706  |
| O | 2.085835  | 2.546643  | 0.503180  |
| H | -0.541714 | -1.020674 | 2.626128  |
| H | 1.460732  | 1.135317  | 0.273513  |
| H | 0.495704  | -0.100989 | 0.847726  |
| H | -1.424865 | -0.978232 | 1.352789  |
| H | -3.346506 | -1.579533 | -0.611308 |
| H | 0.133121  | -0.424891 | -2.888376 |
| H | -1.028410 | -0.628837 | -1.882100 |
| H | 3.018120  | 2.708957  | 0.631152  |
| H | 1.638739  | 3.389006  | 0.544576  |

|   |          |          |           |
|---|----------|----------|-----------|
| H | 0.692448 | 0.073676 | -0.762204 |
|---|----------|----------|-----------|

#9 (Linear): +3.34 kcal/mol

|   |           |           |           |
|---|-----------|-----------|-----------|
| O | 2.015109  | -0.757209 | -0.391385 |
| O | -3.850406 | 1.398359  | 0.178189  |
| O | -0.097592 | -0.894047 | 0.787394  |
| O | -2.258616 | -0.789889 | -0.422842 |
| O | 3.747510  | 1.201513  | -0.032903 |
| H | 0.809737  | -0.854043 | 0.246999  |
| H | 2.320524  | -1.337556 | -1.083181 |
| H | 4.513124  | 1.169245  | 0.535817  |
| H | -0.097512 | -1.543185 | 1.490433  |
| H | 2.655985  | -0.027801 | -0.268599 |
| H | -4.745857 | 1.688557  | -0.046664 |
| H | -2.639947 | -1.430183 | -1.017352 |
| H | -2.891726 | -0.072191 | -0.283666 |
| H | 3.794418  | 2.024421  | -0.513596 |
| H | -0.977711 | -0.878854 | 0.267345  |

#26 (Hemi-bonded): +11.95 kcal/mol

|   |           |           |           |
|---|-----------|-----------|-----------|
| O | -2.939732 | -1.394718 | 0.500327  |
| H | -3.489074 | -0.636696 | 0.692525  |
| H | -3.506946 | -2.162798 | 0.467705  |
| O | 3.539561  | -0.778650 | -0.383026 |
| H | 3.970582  | -1.561948 | -0.716969 |
| H | 4.199271  | -0.089276 | -0.362951 |
| O | 1.095726  | -0.599322 | 0.607256  |
| H | 1.118815  | -0.870529 | 1.522414  |
| H | 2.003085  | -0.676412 | 0.245008  |
| O | -1.485347 | 1.085666  | -0.516968 |
| H | -1.616818 | 1.409734  | -1.408412 |
| H | -0.764315 | 1.599438  | -0.151905 |
| O | -0.831990 | -1.000718 | -0.852510 |
| H | -1.687581 | -1.174039 | -0.325523 |
| H | -0.012054 | -0.855264 | -0.193268 |

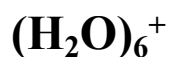

#1 (Single ring): +0 kcal/mol

|   |           |           |           |
|---|-----------|-----------|-----------|
| O | -1.323273 | -1.376950 | -0.169223 |
| O | 1.412724  | 1.221442  | 0.653241  |
| O | -3.203974 | -3.150396 | -0.789942 |
| O | 2.836133  | 2.835320  | -0.747823 |
| O | -1.104468 | 1.378355  | 0.438760  |
| O | 1.493102  | -1.239162 | 0.065674  |
| H | 0.601408  | -1.589510 | -0.033157 |
| H | -3.068170 | -4.067221 | -1.016869 |
| H | -4.140873 | -2.984568 | -0.862216 |
| H | -2.022826 | -2.036345 | -0.403219 |
| H | 3.485199  | 3.422409  | -0.366380 |
| H | 2.836128  | 2.981715  | -1.690903 |
| H | 1.945046  | 1.832742  | 0.077608  |
| H | -1.738138 | 1.889765  | 0.935333  |
| H | -1.480976 | 0.509117  | 0.264674  |
| H | 0.423928  | 1.397472  | 0.606729  |
| H | 1.563587  | 0.249974  | 0.442566  |
| H | 2.059409  | -1.936108 | 0.386911  |

#2 (Tree): +0.12 kcal/mol

|   |           |           |           |
|---|-----------|-----------|-----------|
| O | -0.068876 | -3.121768 | -2.878808 |
| O | -2.642961 | 1.920860  | -0.264933 |
| O | -0.514919 | 0.456402  | -0.107379 |
| O | 1.773634  | -0.247815 | 3.713182  |
| O | 0.260944  | -0.532013 | -2.256483 |
| O | 1.275097  | 1.330267  | 1.450221  |
| H | -0.691801 | -3.460101 | -3.517223 |
| H | 0.151953  | -1.473675 | -2.475965 |
| H | 0.461215  | -3.862365 | -2.595230 |
| H | -3.462547 | 1.676301  | 0.159111  |
| H | 1.506373  | 0.872991  | 2.267598  |
| H | -2.838266 | 2.638466  | -0.862944 |
| H | -0.170213 | 0.071696  | -0.983965 |
| H | -1.313313 | 1.031595  | -0.201562 |
| H | 1.685249  | 2.190347  | 1.462380  |

|   |          |           |           |
|---|----------|-----------|-----------|
| H | 0.904692 | -0.160971 | -2.852978 |
| H | 2.309064 | -0.163228 | 4.514583  |
| H | 0.190108 | 0.836332  | 0.496687  |

#44 (Linear): +3.70 kcal/mol

|   |           |           |           |
|---|-----------|-----------|-----------|
| O | 1.071200  | -2.515128 | 1.248692  |
| O | 0.356314  | 1.428529  | -0.014583 |
| O | -1.797413 | 1.456002  | -1.593337 |
| O | 3.141355  | -3.732463 | 2.383700  |
| O | 0.401394  | -0.225428 | 1.787889  |
| O | -2.808116 | 2.987796  | -3.553195 |
| H | -3.640636 | 2.783039  | -3.971933 |
| H | 0.779999  | -3.021430 | 0.495410  |
| H | 0.680333  | -1.193914 | 1.524721  |
| H | -0.382723 | -0.211547 | 2.336406  |
| H | -2.131650 | 2.042833  | -2.310568 |
| H | 3.080467  | -4.384913 | 3.077259  |
| H | 1.841074  | -2.959622 | 1.652246  |
| H | -0.388155 | 1.543405  | -0.635447 |
| H | 0.365085  | 0.480389  | 1.022539  |
| H | 4.061441  | -3.676760 | 2.137742  |
| H | -2.474749 | 3.775464  | -3.975133 |
| H | 0.892891  | 2.216475  | -0.007972 |

#63 (Double ring): +5.02 kcal/mol

|   |           |           |           |
|---|-----------|-----------|-----------|
| O | 1.066033  | 2.098122  | -0.576439 |
| O | -2.387310 | -1.658168 | 0.217014  |
| O | 1.509034  | -0.113944 | -2.383697 |
| O | 0.313850  | 0.637723  | 1.359168  |
| O | 0.601863  | -1.545035 | -0.101333 |
| O | -2.140542 | 0.648663  | 1.764117  |
| H | 1.442264  | 2.972872  | -0.633055 |
| H | 2.390538  | -0.276712 | -2.718672 |
| H | 0.940812  | -0.133439 | -3.153632 |
| H | 1.342090  | 1.588901  | -1.342899 |
| H | 0.482606  | -0.244015 | 0.951323  |
| H | 0.596041  | 1.321284  | 0.682838  |
| H | -1.469567 | -1.861556 | -0.030298 |



|   |           |           |           |
|---|-----------|-----------|-----------|
| H | 1.102114  | -2.324194 | 0.136576  |
| H | 0.953794  | -1.232020 | -0.945999 |
| H | -2.527058 | -0.132806 | 1.349896  |
| H | -0.679065 | 0.708994  | 1.594344  |
| H | -2.654914 | 0.888750  | 2.530932  |

#84 (Multiple ring): +7.62 kcal/mol

|   |           |           |           |
|---|-----------|-----------|-----------|
| O | 0.445270  | 2.864108  | -0.550480 |
| O | -0.601949 | -2.698523 | 0.590441  |
| O | -0.881621 | -0.302242 | 1.286057  |
| O | -1.409714 | 0.875147  | -0.938944 |
| O | 1.567678  | 0.443866  | 0.846499  |
| O | 0.810312  | -1.081434 | -1.386565 |
| H | -0.906777 | 1.706187  | -0.921928 |
| H | -2.260903 | 1.061893  | -1.331182 |
| H | 0.087253  | -0.535267 | -1.704099 |
| H | 1.689098  | -0.113239 | 0.066187  |
| H | 1.087557  | 2.433885  | 0.037841  |
| H | -1.260468 | 0.160652  | 0.484719  |
| H | 2.346087  | 0.354831  | 1.394051  |
| H | -0.871307 | -1.294354 | 1.102555  |
| H | -0.113051 | -2.742320 | -0.232043 |
| H | 1.314833  | -1.328716 | -2.159601 |
| H | 0.065720  | -0.007677 | 1.338639  |
| H | -0.971262 | -3.554867 | 0.791183  |

#91 (Hemi-bonded): +11.61 kcal/mol

|   |           |           |           |
|---|-----------|-----------|-----------|
| O | -1.369546 | -0.415267 | -1.054107 |
| H | -1.720240 | -1.280048 | -0.675013 |
| H | -1.506090 | 0.331488  | -0.372050 |
| O | 1.092102  | 1.227276  | 1.346771  |
| H | 1.773613  | 1.861833  | 1.059819  |
| H | 1.298687  | 1.013973  | 2.254777  |
| O | -1.558049 | 1.408508  | 0.673349  |
| H | -2.121494 | 2.177716  | 0.680638  |
| H | -0.694426 | 1.638119  | 1.038936  |
| O | -2.275240 | -2.615419 | -0.102595 |
| H | -3.041016 | -3.091576 | -0.416230 |

|   |           |           |           |
|---|-----------|-----------|-----------|
| H | -1.720795 | -3.236872 | 0.363952  |
| O | 0.464993  | -0.950134 | -0.166469 |
| H | 0.954720  | -0.970220 | -0.989618 |
| H | 0.767156  | -0.163431 | 0.330939  |
| O | 2.967446  | 2.975982  | 0.517582  |
| H | 2.889337  | 3.926983  | 0.531481  |
| H | 3.889300  | 2.785003  | 0.361287  |

# $(\text{H}_2\text{O})_7^+$

#1 (Single ring): +0 kcal/mol

|   |           |           |           |
|---|-----------|-----------|-----------|
| O | 3.559490  | 4.088010  | -0.640270 |
| O | 0.918515  | -1.833192 | 0.333041  |
| O | -1.896177 | -2.212994 | 0.323477  |
| O | 0.691350  | 0.707300  | 0.519327  |
| O | -1.863397 | 0.621098  | 0.473627  |
| O | -3.661982 | -4.197424 | 0.093851  |
| O | 1.833762  | 2.105651  | -1.201686 |
| H | -2.550854 | -2.948050 | 0.236198  |
| H | -2.167984 | -0.291917 | 0.468821  |
| H | 3.349644  | 5.012166  | -0.531954 |
| H | 0.904419  | -0.265424 | 0.459897  |
| H | 1.143569  | 1.261597  | -0.201959 |
| H | 0.051917  | -2.251116 | 0.357536  |
| H | -2.515719 | 1.152638  | 0.921833  |
| H | -0.302201 | 0.798580  | 0.520406  |
| H | 1.552770  | -2.435156 | 0.712941  |
| H | -4.611206 | -4.111798 | 0.049076  |
| H | -3.464595 | -5.126127 | -0.000445 |
| H | 4.507088  | 4.011773  | -0.563317 |
| H | 2.458040  | 2.823009  | -0.999765 |
| H | 1.747096  | 2.039113  | -2.147949 |

#5 (Tree): +0.81 kcal/mol

|   |           |           |           |
|---|-----------|-----------|-----------|
| O | -4.580233 | 1.289197  | 0.126075  |
| O | -0.483997 | -0.751729 | -0.277218 |
| O | 3.092488  | -1.046039 | 2.770026  |
| O | 0.614649  | -1.901384 | 1.716519  |
| O | 2.642533  | 1.489156  | -2.978727 |
| O | -1.886054 | 1.254313  | 0.298188  |
| O | 0.963124  | -0.528087 | -2.320908 |
| H | -5.087665 | 1.692895  | -0.573438 |
| H | 0.346860  | -2.767794 | 2.009941  |
| H | -0.022416 | -1.184756 | 0.492980  |
| H | -1.024381 | 0.060542  | -0.025117 |
| H | 1.461887  | -1.696252 | 2.126397  |

|   |           |           |           |
|---|-----------|-----------|-----------|
| H | 3.656709  | -1.361897 | 3.489701  |
| H | 0.810707  | -1.061760 | -3.095421 |
| H | 1.559035  | 0.196924  | -2.568260 |
| H | 3.594007  | 1.419712  | -2.976600 |
| H | 2.428994  | 2.260013  | -3.498515 |
| H | -2.855566 | 1.260874  | 0.242985  |
| H | 0.101362  | -0.627580 | -1.087891 |
| H | -1.616429 | 2.009283  | 0.812611  |
| H | -5.209063 | 0.943883  | 0.754565  |

#74 (Double ring): +2.70 kcal/mol

|   |           |           |           |
|---|-----------|-----------|-----------|
| O | -3.424290 | -3.218864 | 0.714352  |
| O | 1.525094  | -1.812852 | 0.652495  |
| O | 1.872899  | 0.283245  | -0.749654 |
| O | -1.271683 | -1.798183 | 0.069499  |
| O | -0.662855 | 0.505458  | -1.452313 |
| O | 2.207017  | 2.360234  | 0.550421  |
| O | -0.358506 | 3.009424  | 0.154198  |
| H | 1.856409  | -0.540777 | -0.182224 |
| H | 2.102652  | 1.132023  | -0.210089 |
| H | -4.320060 | -3.091883 | 0.411173  |
| H | -1.096450 | -0.250494 | -1.035104 |
| H | -2.079630 | -2.318437 | 0.305846  |
| H | 2.092062  | -2.545657 | 0.877193  |
| H | -0.972358 | 0.540011  | -2.355522 |
| H | 0.971903  | 0.389287  | -1.137582 |
| H | 0.614526  | -2.118600 | 0.632155  |
| H | 1.347951  | 2.813048  | 0.523774  |
| H | 2.900329  | 3.003643  | 0.426838  |
| H | -3.438948 | -3.963046 | 1.311582  |
| H | -0.806811 | 2.352532  | -0.378114 |
| H | -1.006431 | 3.652358  | 0.427852  |

#92 (Multiple ring): +3.04 kcal/mol

|   |           |           |           |
|---|-----------|-----------|-----------|
| O | 0.018209  | -0.881430 | -1.857051 |
| O | 0.462743  | -2.744616 | -0.180059 |
| O | 1.034251  | 1.834619  | 1.133772  |
| O | -1.753823 | 1.219216  | 1.443677  |

|   |           |           |           |
|---|-----------|-----------|-----------|
| O | 0.314118  | -0.769946 | 1.888598  |
| O | 1.754973  | 0.898454  | -1.392409 |
| O | -2.140160 | 0.259633  | -1.168121 |
| H | 0.604692  | -2.453136 | 0.722351  |
| H | 0.729121  | -0.178618 | -1.752844 |
| H | -1.500507 | 0.456206  | 1.968536  |
| H | 1.485674  | 2.544085  | 1.586861  |
| H | 2.261309  | 1.424323  | -2.005663 |
| H | -2.433407 | 1.674295  | 1.937960  |
| H | 0.921183  | -0.006988 | 1.896507  |
| H | 1.622099  | 1.401745  | -0.579467 |
| H | 0.800485  | -3.631291 | -0.275425 |
| H | 0.090492  | 2.009778  | 1.212558  |
| H | 0.212406  | -1.661482 | -1.262071 |
| H | -3.010439 | 0.216425  | -1.554584 |
| H | -0.874247 | -0.482703 | -1.635220 |
| H | -2.205416 | 0.635185  | -0.282021 |

#190 (Linear): +5.16 kcal/mol

|   |           |           |           |
|---|-----------|-----------|-----------|
| O | -0.939452 | -1.134303 | 1.537574  |
| O | -0.080008 | -2.733132 | 3.358952  |
| O | -0.884886 | 2.383173  | -2.863998 |
| O | -0.050232 | 1.081209  | 1.256731  |
| O | 2.138207  | -4.322478 | 3.334614  |
| O | -0.870049 | 3.450053  | -5.338296 |
| O | 0.885983  | 1.710736  | -0.952169 |
| H | -0.835832 | 2.773321  | -3.765970 |
| H | 0.705737  | -3.299124 | 3.354803  |
| H | 2.164840  | -5.238207 | 3.068958  |
| H | 1.785005  | 1.997723  | -1.084597 |
| H | -1.676085 | 3.608535  | -5.823451 |
| H | 0.345045  | 1.994894  | -1.709888 |
| H | 0.328696  | 1.353369  | 0.346496  |
| H | 2.937039  | -4.162683 | 3.830709  |
| H | -0.153090 | 3.745140  | -5.893584 |
| H | -1.355597 | -1.629115 | 0.837218  |
| H | -0.647427 | 1.745368  | 1.599199  |
| H | -0.582073 | -2.945218 | 4.140121  |

|   |           |           |          |
|---|-----------|-----------|----------|
| H | -0.443360 | 0.078283  | 1.347409 |
| H | -0.592103 | -1.758866 | 2.223743 |

#291 (Hemi-bonded): +11.15 kcal/mol

|   |           |           |           |
|---|-----------|-----------|-----------|
| O | -1.247106 | 3.130030  | -1.041523 |
| H | -0.782800 | 3.571039  | -1.749248 |
| H | -1.859298 | 3.764787  | -0.676881 |
| O | -2.173965 | -2.885123 | 1.379567  |
| H | -2.026094 | -3.826368 | 1.428563  |
| H | -2.701088 | -2.654241 | 2.140383  |
| O | 2.982992  | 1.614962  | 1.006959  |
| H | 2.697424  | 1.596925  | 1.916854  |
| H | 3.887711  | 1.917374  | 0.999256  |
| O | -0.179894 | 1.056499  | 0.214706  |
| H | -0.575787 | 1.835605  | -0.236836 |
| H | -0.638047 | 0.254846  | -0.116236 |
| O | -1.359598 | -1.253074 | -0.611486 |
| H | -2.090985 | -1.211829 | -1.223797 |
| H | -1.652229 | -1.834163 | 0.112773  |
| O | 1.259265  | -1.387351 | -1.495667 |
| H | 0.348696  | -1.663738 | -1.349539 |
| H | 1.641442  | -1.932029 | -2.177985 |
| O | 1.433779  | 1.145988  | -1.051809 |
| H | 1.442069  | 0.167643  | -1.250596 |
| H | 2.014301  | 1.308108  | -0.266485 |

# $(\text{H}_2\text{O})_8^+$

#1 (Single ring): +0 kcal/mol

|   |           |           |           |
|---|-----------|-----------|-----------|
| O | 0.157198  | 0.989409  | 1.883699  |
| O | -1.906599 | -0.330939 | 1.050173  |
| O | -1.665446 | -1.189471 | -1.647636 |
| O | 0.996821  | -0.132887 | -2.058394 |
| O | -0.407143 | 3.453840  | 2.593415  |
| O | 4.354108  | -0.238888 | 1.039515  |
| O | -3.340972 | -2.537488 | -3.242296 |
| O | 1.950003  | 0.766743  | 0.287966  |
| H | -2.287483 | -1.685406 | -2.231864 |
| H | 0.971774  | 0.886369  | 1.182617  |
| H | 5.167364  | 0.257436  | 0.995748  |
| H | -2.473510 | -0.860762 | 1.603547  |
| H | 4.589258  | -1.122965 | 1.308498  |
| H | 1.690224  | 0.445196  | -0.592138 |
| H | -0.055107 | 1.920407  | 2.112846  |
| H | 1.267013  | 0.094162  | -2.943169 |
| H | -4.248642 | -2.769779 | -3.062548 |
| H | -0.320741 | 3.767305  | 3.490490  |
| H | -3.140734 | -2.867995 | -4.114602 |
| H | -0.521683 | 4.221783  | 2.039205  |
| H | -0.649730 | 0.492353  | 1.596336  |
| H | 0.118009  | -0.514789 | -2.113854 |
| H | -1.941463 | -0.694345 | 0.158656  |
| H | 2.797723  | 0.371410  | 0.543315  |

#18 (Double ring): +1.48 kcal/mol

|   |           |           |           |
|---|-----------|-----------|-----------|
| O | 1.029317  | 1.553842  | 1.164090  |
| O | -1.480510 | 1.150761  | 1.350207  |
| O | -2.295530 | -1.325491 | 0.267349  |
| O | 0.343395  | -2.363289 | -0.241746 |
| O | 1.792653  | 2.997571  | -0.712863 |
| O | 3.333915  | 0.997534  | -1.578590 |
| O | -4.735605 | -2.312110 | -0.160396 |
| O | 2.228115  | -0.665382 | 0.558312  |
| H | 1.488916  | 0.685691  | 1.002634  |

|   |           |           |           |
|---|-----------|-----------|-----------|
| H | 3.180942  | 0.228272  | -1.027453 |
| H | -1.900315 | 0.345756  | 1.026079  |
| H | 3.866216  | 0.725683  | -2.320234 |
| H | 2.787182  | -1.084796 | 1.209078  |
| H | 1.298370  | 2.219466  | 0.433060  |
| H | 0.418817  | -3.143885 | -0.782829 |
| H | -4.948842 | -3.203919 | -0.424243 |
| H | 2.426204  | 2.439602  | -1.195285 |
| H | -5.561565 | -1.837974 | -0.102185 |
| H | -3.200226 | -1.690442 | 0.106982  |
| H | 2.167229  | 3.870084  | -0.622823 |
| H | 0.040708  | 1.421775  | 1.238208  |
| H | 1.587684  | -1.341279 | 0.259125  |
| H | -2.048204 | 1.542303  | 2.008285  |
| H | -0.592334 | -2.168721 | -0.142860 |

#22 (Tree): +1.59 kcal/mol

|   |           |           |           |
|---|-----------|-----------|-----------|
| O | -1.308925 | -4.534739 | -1.496473 |
| O | 1.407655  | 1.158699  | -0.609522 |
| O | -0.113504 | 2.526210  | -2.408396 |
| O | 0.553949  | -0.719116 | 3.100797  |
| O | 0.250379  | -0.740648 | 0.591238  |
| O | -1.372649 | 0.032450  | 4.847195  |
| O | 0.667965  | -2.988748 | -0.482644 |
| O | 0.088281  | 4.813222  | -3.854876 |
| H | 0.378359  | -0.760345 | 1.587143  |
| H | 2.166486  | 1.644998  | -0.301406 |
| H | 0.927813  | 1.716619  | -1.242899 |
| H | -1.570485 | -5.388443 | -1.161148 |
| H | 0.805384  | 5.432286  | -3.963193 |
| H | 0.433332  | -1.624140 | 0.147967  |
| H | -2.155145 | -0.448762 | 5.103364  |
| H | 1.478318  | -3.243322 | -0.914417 |
| H | -0.606514 | 5.093608  | -4.445283 |
| H | 1.189464  | -1.237299 | 3.585893  |
| H | 0.720056  | 0.027648  | 0.145385  |
| H | -0.146816 | -0.459290 | 3.719842  |
| H | -1.367486 | 0.836912  | 5.359532  |



|   |           |           |           |
|---|-----------|-----------|-----------|
| H | -0.044599 | -3.533682 | -0.853181 |
| H | 0.000947  | 3.358762  | -2.916328 |
| H | -1.832354 | -4.376540 | -2.277833 |

#40 (Multiple ring): +1.93 kcal/mol

|   |           |           |           |
|---|-----------|-----------|-----------|
| O | -0.110006 | -1.820632 | 1.293493  |
| O | -2.312812 | -0.062844 | 0.934628  |
| O | -2.323240 | -1.034834 | -1.753520 |
| O | 0.262367  | -1.357112 | -1.460996 |
| O | 1.570555  | 1.770564  | 0.322312  |
| O | 2.242229  | 0.592429  | -1.829018 |
| O | -0.917634 | 2.246324  | 0.272522  |
| O | 1.730356  | 0.068519  | 2.192858  |
| H | 0.099796  | -1.910794 | 0.354014  |
| H | 2.435745  | -0.129862 | 2.802486  |
| H | 1.194361  | -0.722995 | 2.058985  |
| H | 1.726653  | 1.125067  | 1.074277  |
| H | 1.711389  | -0.169144 | -2.076906 |
| H | -1.661663 | -0.710199 | 1.236428  |
| H | 1.859567  | 1.370512  | -0.548601 |
| H | -2.654566 | -0.640060 | -0.942945 |
| H | -1.512330 | 1.540363  | 0.563568  |
| H | -0.214123 | -2.706576 | 1.634959  |
| H | -1.333418 | 3.086607  | 0.446060  |
| H | -3.027281 | -0.081078 | 1.567655  |
| H | 0.597295  | 2.022406  | 0.301118  |
| H | -2.964869 | -0.892006 | -2.443338 |
| H | -0.680212 | -1.309504 | -1.764426 |
| H | 2.744989  | 0.881666  | -2.585521 |

#478 (Linear): +6.59 kcal/mol

|   |           |           |           |
|---|-----------|-----------|-----------|
| O | -0.469618 | 2.605832  | 4.059467  |
| O | -1.128444 | 4.278627  | 6.100177  |
| O | -1.379548 | -5.098440 | -5.290567 |
| O | 0.333736  | -3.329624 | -4.097596 |
| O | 0.498547  | 2.819699  | 1.492827  |
| O | 1.567682  | 0.673810  | 0.491864  |
| O | -0.348468 | -1.286588 | -2.649654 |

|   |           |           |           |
|---|-----------|-----------|-----------|
| O | 0.161305  | -1.161249 | -0.272920 |
| H | -0.470155 | -0.529548 | -3.215296 |
| H | -0.699472 | 3.239222  | 4.772943  |
| H | -0.081920 | -2.057709 | -3.202994 |
| H | -1.098327 | 5.229523  | 6.164114  |
| H | -1.625766 | -5.959636 | -4.963297 |
| H | 0.161747  | 2.863407  | 2.399114  |
| H | 1.214368  | -3.553857 | -4.382063 |
| H | 2.412175  | 0.494960  | 0.896651  |
| H | 1.199456  | 1.501599  | 0.879946  |
| H | -0.628366 | -1.284617 | 0.252140  |
| H | 0.754200  | -0.365336 | 0.075672  |
| H | 0.651473  | 3.711728  | 1.196408  |
| H | -1.437267 | 3.957723  | 6.943643  |
| H | -1.752524 | -5.024730 | -6.165156 |
| H | -0.272645 | -3.955954 | -4.517446 |
| H | -0.044711 | -1.183761 | -1.303166 |

#594 (Hemi-bonded): +13.34 kcal/mol

|   |           |           |           |
|---|-----------|-----------|-----------|
| O | -1.591104 | 1.740558  | -0.405788 |
| O | -4.219121 | -2.760543 | -0.099107 |
| O | 3.599816  | 2.642123  | -0.146518 |
| O | 0.831229  | 1.196647  | 0.781496  |
| O | 0.382393  | -1.390096 | 1.297398  |
| O | -1.978793 | -1.189425 | 0.199456  |
| O | 2.368044  | -1.413934 | -0.569502 |
| O | 1.757078  | 1.026732  | -1.048821 |
| H | 3.649874  | 2.932178  | 0.760843  |
| H | -1.543488 | 1.944835  | -1.338500 |
| H | -0.005178 | 1.458906  | 0.352989  |
| H | 0.722481  | 0.250518  | 1.035952  |
| H | -4.393065 | -3.351414 | -0.827270 |
| H | -0.536190 | -1.458686 | 0.955889  |
| H | 0.386297  | -1.745299 | 2.182715  |
| H | -4.863782 | -2.966512 | 0.572900  |
| H | -2.205036 | -0.298938 | -0.061499 |
| H | -2.764215 | -1.742136 | 0.097031  |
| H | -2.157660 | 2.408045  | -0.022151 |

|   |          |           |           |
|---|----------|-----------|-----------|
| H | 1.725701 | -1.762306 | 0.060571  |
| H | 2.625734 | -2.112001 | -1.164955 |
| H | 4.347596 | 3.014765  | -0.606786 |
| H | 2.045670 | 0.073931  | -0.916909 |
| H | 2.469006 | 1.623861  | -0.702458 |

The parameters  $\alpha$  and  $\beta$  in the width equation:

$$\Gamma = \alpha(\Delta\omega)^\beta = \alpha(\omega_{free\ OH} - \omega_{H-bonded\ OH})^\beta$$

| Size                                         | $\alpha$ | $\beta$ |
|----------------------------------------------|----------|---------|
| (H <sub>2</sub> O) <sub>5</sub> <sup>+</sup> | 0.00269  | 1.66324 |
| (H <sub>2</sub> O) <sub>6</sub> <sup>+</sup> | 0.00112  | 1.81286 |
| (H <sub>2</sub> O) <sub>7</sub> <sup>+</sup> | 0.00476  | 1.65940 |
| (H <sub>2</sub> O) <sub>8</sub> <sup>+</sup> | 0.04640  | 1.29963 |
